# Supplementary material for: Effect of memantine, an anti-Alzheimer’s drug, on rodent microglial cells in vitro
Source: PubMed Central journal article supplement (PMC7969939; doi:10.1038/s41598-021-85625-4), 2021-03-17

## **Supplementary information**

### **Title:**

**Effect of memantine, an anti-Alzheimer's drug, on rodent microglial cells in vitro**

### **Authors:**

Toru Murakawa-Hirachi<sup>1\*</sup>, Yoshito Mizoguchi<sup>1\*</sup>, Masahiro Ohgidani<sup>2</sup>, Yoshinori Haraguchi<sup>1</sup> and Akira Monji<sup>1</sup>

1. Department of Psychiatry, Faculty of Medicine, Saga University, 5-1-1 Nabeshima, Saga 849-8501, Japan

2. Department of Integrative Anatomy, Nagoya City University Graduate School of Medical Sciences, Nagoya 467-8601, Japan

\*T. Murakawa and Y. Mizoguchi have contributed equally to this work.

### **Corresponding authors:**

Yoshito Mizoguchi, M.D., Ph.D.

Department of Psychiatry, Faculty of Medicine, Saga University, 5-1-1 Nabeshima, Saga 849-8501, Japan.

Phone: +81-952-34-2304 Fax: +81-952-34-2048

E-mail: [ymizo@cc.saga-u.ac.jp](mailto:ymizo@cc.saga-u.ac.jp)

### Supplemental Figure 1.

Expression of NMDARs in rodent microglial cells. We observed that both NMDAR1 (A) and NMDAR2A (B) were expressed in mouse 6-3 microglial cells using flow cytometry. In each panel, 'Non-stain' and 'Control' show measurements without antibody and with antibody alone, respectively.

### Supplemental Figure 2.

Effects of pretreatment with MK801, another antagonist of NMDARs, on production of NO, intracellular  $\text{Ca}^{2+}$  elevation and phagocytic activity in rodent microglial cells. **A.B.** Ten representative traces showing the treatment of 0.1 ng/mL TNF induced the increase in the DAF-2 fluorescence (A) and 12 hrs pretreatment with 10  $\mu\text{M}$  MK801 did not affect the TNF-induced increase in the DAF-2 fluorescence in mouse 6-3 microglial cells (**B**). **C.** Bar graphs showing that pretreatment with MK801 (10 $\mu\text{M}$ , 12 hrs) did not the production of NO induced by TNF treatment in mouse 6-3 microglial cells. **D.** Average traces of 5  $[\text{Ca}^{2+}]_i$  traces showing a treatment of 3 ng/mL TNF-induced sustained increase in  $[\text{Ca}^{2+}]_i$  in mouse primary microglial cells. **E.** Bar graphs showing that pretreatment with MK801 (10 $\mu\text{M}$ , 12 hrs) did not affect the elevation of  $[\text{Ca}^{2+}]_i$  induced by TNF in mouse primary microglial cells. **F.** Pretreatment with MK801 (10 $\mu\text{M}$ , 12 hrs) did not affect phagocytic activity of mouse primary microglial cells. Bar graph showing pretreatment of 10  $\mu\text{M}$  MK801 for 12 hrs did not affect the amount of  $\beta$ -Amyloid (1-42) phagocytosed by mouse primary microglial cells (n= 165 cells in control; n= 198 cells in MK801 from 5 independent experiments each). NS: not significant vs control.

Figure S1

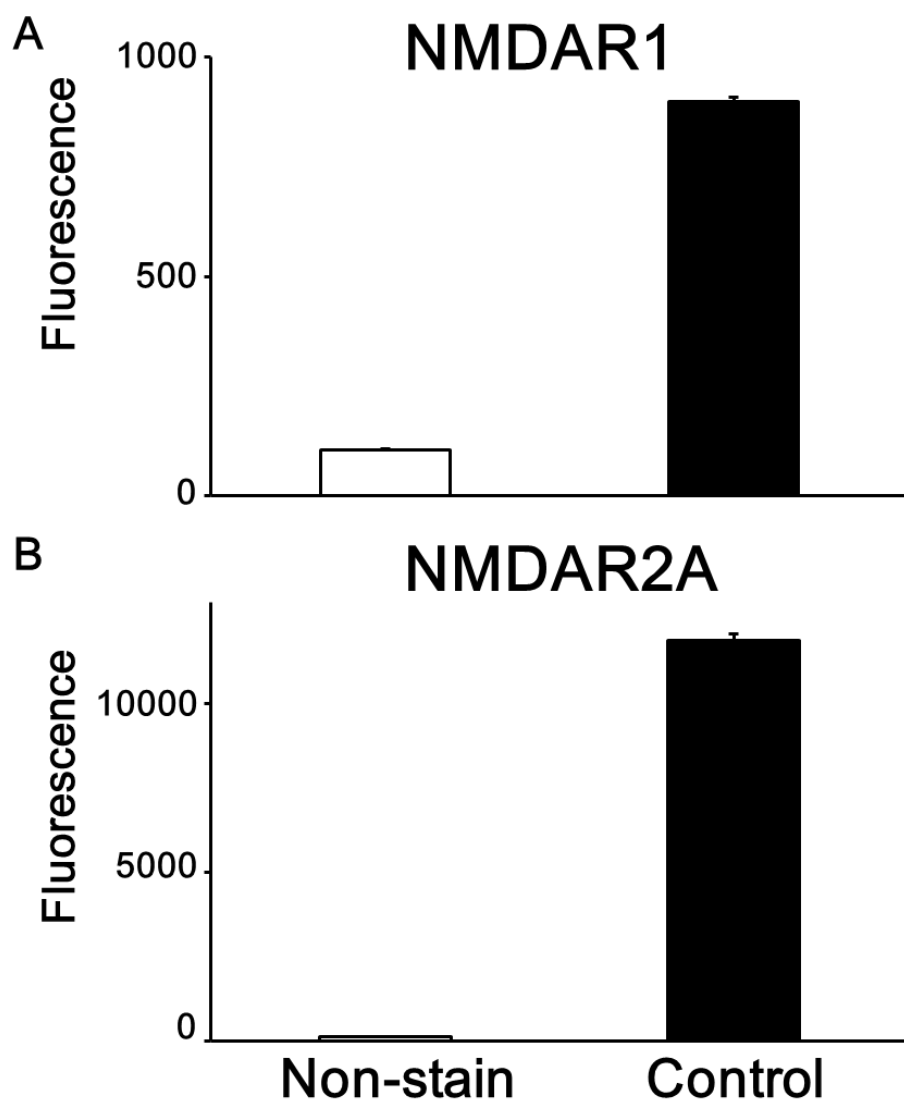

Figure S2

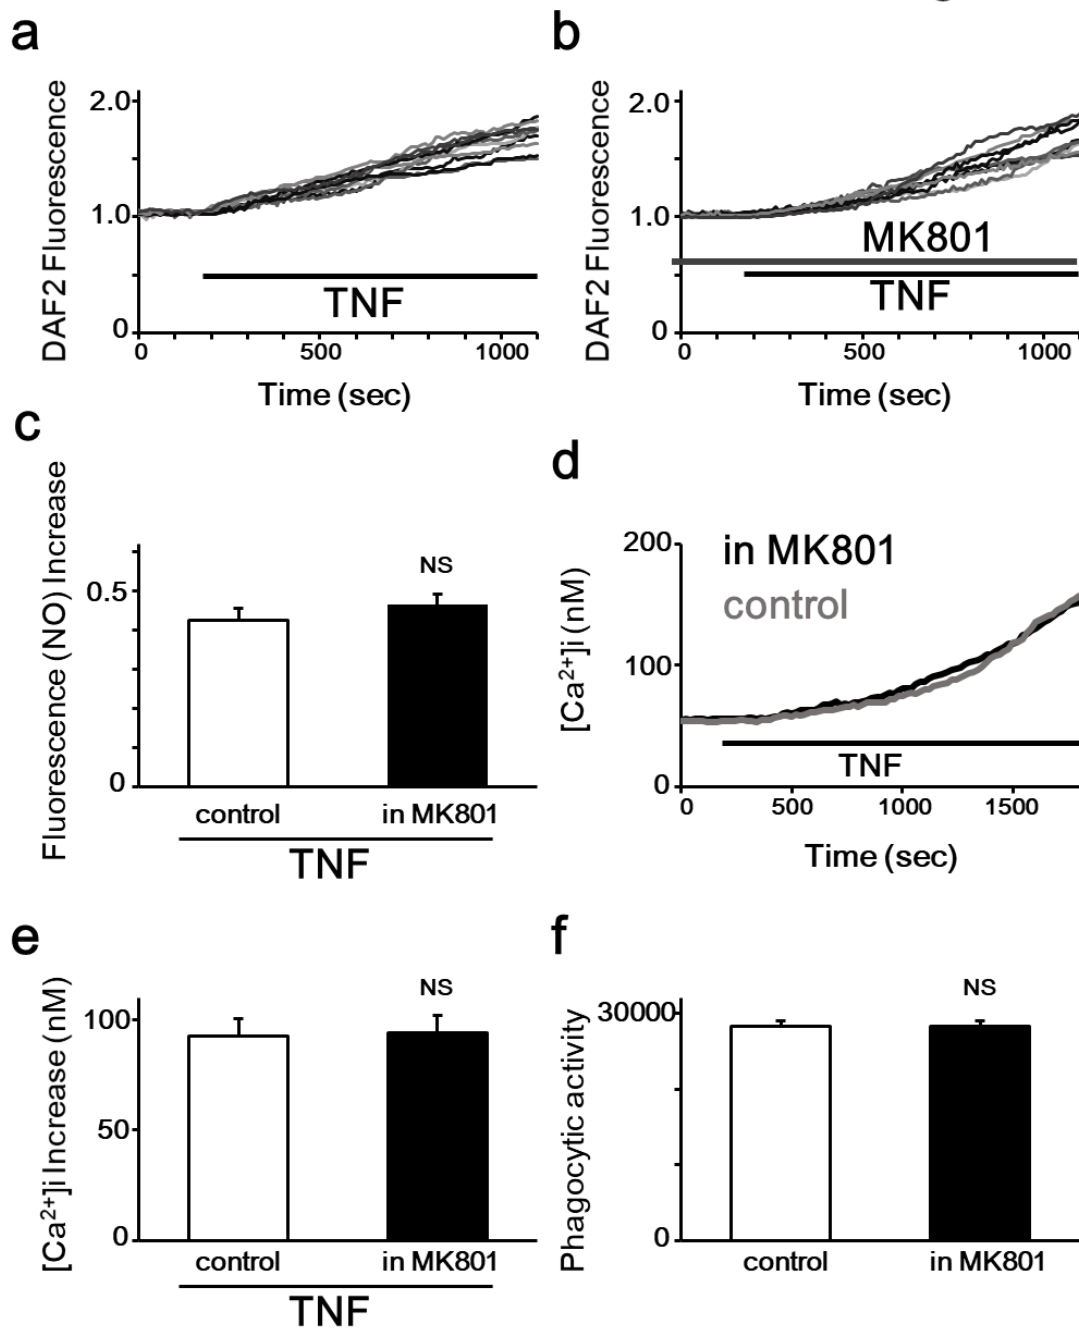

Supplement: 41598_2021_85625_MOESM1_ESM.pdf [file 41598_2021_85625_MOESM1_ESM.pdf]
